# Supplementary material
Source: PubMed Central journal article supplement (PMC4245455)
Supplement: NIHMS632797-supplement-Next_of_Kin_confirmation_for_Dr__Kao.pdf [file NIHMS632797-supplement-Next_of_Kin_confirmation_for_Dr__Kao.pdf]

**From:** [Warren Goda](#)  
**To:** [kbifolck@strokeahajournal.org](mailto:kbifolck@strokeahajournal.org)  
**Cc:** [Liz Holliday](#)  
**Subject:** STROKE/2014/006609R1  
**Date:** Tuesday, September 16, 2014 12:24:27 PM

---

Dear Kate,

I am writing regarding Dr Linda Kao's Electronic Disclosure and Copyright forms for the manuscript [**STROKE/2014/006609R1**], titled "Polygenic overlap between kidney function and large artery atherosclerotic stroke", on which she is a co-author.

As Dr Kao's next of kin, I state and confirm that I have completed the electronic forms on her behalf.

Sincerely,  
Warren G. Goda
